# Supplementary material for: Defect-mediated phase transition temperature of VO2 (M) nanoparticles with excellent thermochromic performance and low threshold voltage
Source: Royal Society of Chemistry journal article supplement (doi:10.1039/c3ta14822j), 2014-01-01
Supplement: c3ta14822j.pdf [file c3ta14822j.pdf]

## Electronic Supplementary Information

### Defect-mediated phase transition temperature of VO<sub>2</sub> (M) nanoparticles with excellent thermochromic performance

Ming Li,<sup>†&</sup> Xing Wu,<sup>§&</sup> Liang Li,<sup>†</sup> Yuxi Wang,<sup>§</sup> Dengbing Li,<sup>†</sup> Jing Pan,<sup>†</sup> Sijia Li,<sup>§</sup> Litao Sun\*<sup>§</sup> and Guanghai Li\*<sup>†‡</sup>

<sup>†</sup> Key Laboratory of Materials Physics, Anhui Key Laboratory of Nanomaterials and Nanotechnology, Institute of Solid State Physics, Chinese Academy of Sciences

Hefei 230031, P. R. China, E-mail: ghli@issp.ac.cn

<sup>‡</sup> University of Science and Technology of China, Hefei 230026, P. R. China

<sup>§</sup> SEU-FEI Nano-Pico Center Key Laboratory of MEMS of Ministry of Education

Southeast University, Nanjing, P. R. China, E-mail: slt@seu.edu.cn

<sup>&</sup> These authors contributed equally to this work

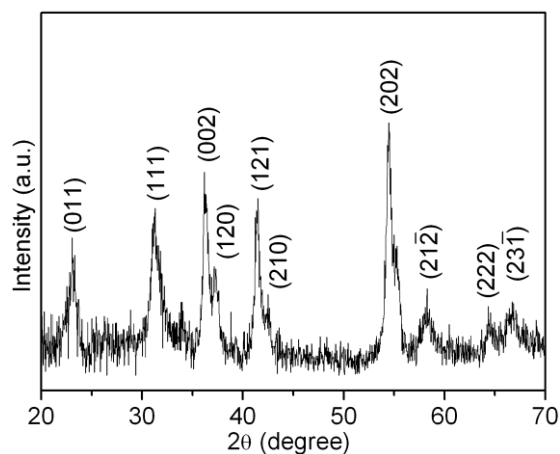

**Fig. S1** XRD pattern of the as-prepared VO<sub>2</sub> (D) NPs after hydrothermal reaction at 220 °C for 36 h.

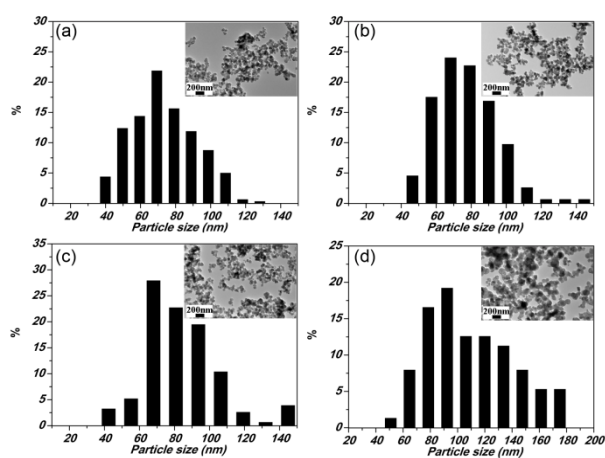

**Fig. S2** Size distribution histograms of VO<sub>2</sub> (M) NPs obtained after annealing at temperature of (a) 300, (b) 350, (c) 400 and (d) 450 °C with the average size of 74, 77, 85 and 109 nm, respectively. The particle size distributions were obtained by measurement of about 150 nanocrystals from corresponding TEM images (upper right corner).

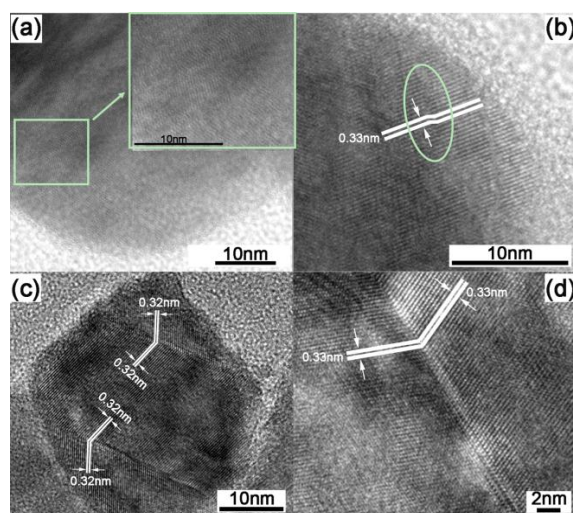

**Fig. S3** TEM images of (a) lattice distortion and (b) grain boundary in VO<sub>2</sub> (M) NPs that obtained at 300 °C for 1h, the inset is corresponding enlargement of the lattice distortion; (c) grain boundaries and (d) twin boundary correspond to NPs obtained at 400 °C for 1h.

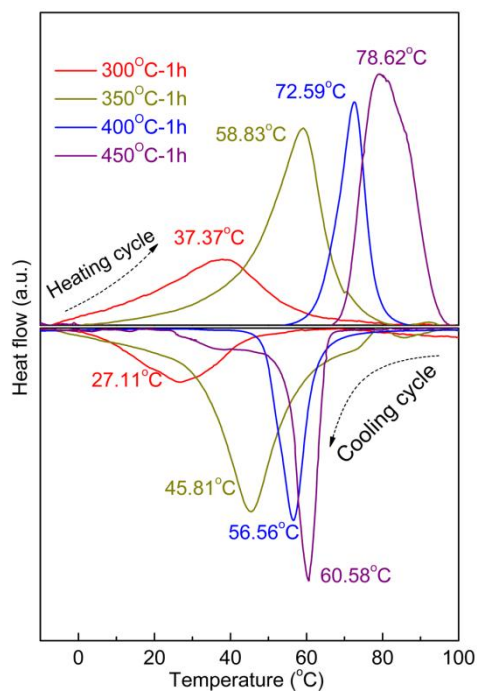

**Fig. S4** DSC curves of VO<sub>2</sub> (M) NPs annealed at 300, 350, 400 and 450 °C for 1h under vacuum of about 20 Pa.

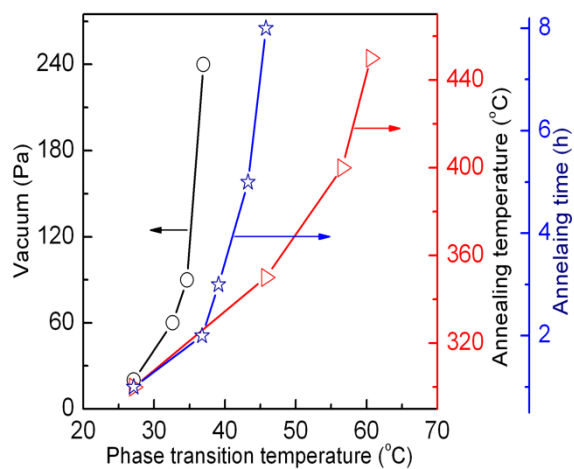

**Fig. S5** Dependence of phase transition temperature of VO<sub>2</sub> (M) NPs on selected vacuum (300°C, 1h), annealing temperature (20Pa, 1h) and thermal treatment time (300°C, 20Pa) in cooling cycle in DSC measurement.

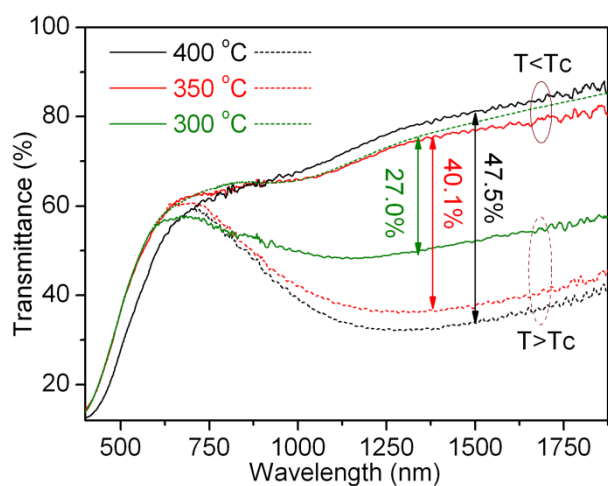

**Fig. S6** Variable-temperature optical transmittances of VO<sub>2</sub> (M) NPs thin films prepared by spin-coating 300, 350 and 400 °C annealed VO<sub>2</sub> (M) NPs with a infrared modulation of about 27.0, 40.1 and 47.5 % at the wavelengths of 1.5 μm, respectively.

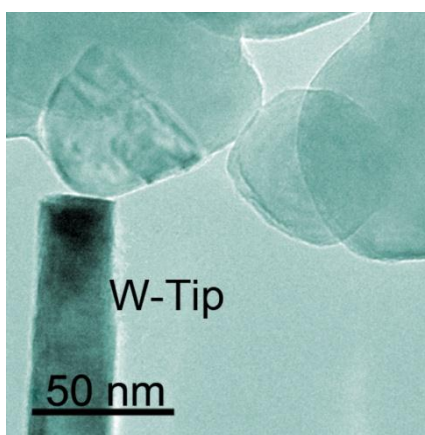

**Fig. S7** TEM image of a tungsten tip and the corresponding VO<sub>2</sub> (M) NPs under the *in-situ* electrical test.
